# Supplementary material for: Pt⋯Pt interaction triggered tuning of circularly polarized luminescence activity in chiral dinuclear platinum(ii) complexes
Source: Royal Society of Chemistry journal article supplement (doi:10.1039/c8dt02277a), 2018-01-01
Supplement: c8dt02277a1.pdf [file c8dt02277a1.pdf]

Electronic supplementary information (ESI)

## Pt...Pt interaction triggered tuning of circularly polarized luminescence activity in chiral dinuclear platinum(II) complexes

Xiao-Peng Zhang,<sup>\*a</sup> Li-Li Wang,<sup>a</sup> Xiao-Wei Qi,<sup>a</sup> Da-Shuai Zhang,<sup>a</sup> Qian-Ying Yang,<sup>a</sup> Zai-Feng Shi,<sup>\*a</sup> Qiang Lin,<sup>a</sup> and Tao Wu,<sup>\*b</sup>

<sup>a</sup> College of Chemistry and Chemical Engineering, Hainan Normal University, Haikou 571158, People's Republic of China. E-mail: [zxp\\_inorganic@126.com](mailto:zxp_inorganic@126.com); [zaifengshi\\_hnnu@sina.com](mailto:zaifengshi_hnnu@sina.com).

<sup>b</sup> Institute of Organic Chemistry and Biochemistry, Academy of Sciences, Flemingovo náměstí 2, 16610 Prague 6, Czech Republic. E-mail: [wu@uochb.cas.cz](mailto:wu@uochb.cas.cz).

### Table of contents

|                                                                                                 |     |
|-------------------------------------------------------------------------------------------------|-----|
| <b>Table S1.</b> Structural parameters of complexes (-)-1, (+)-1 and (-)-2-ClO <sub>4</sub> -Cl | S3  |
| <b>Table S2.</b> Spectroscopic and photophysical data for (-)-1 and (-)-2                       | S4  |
| <b>Fig. S1</b> The <sup>1</sup> H NMR spectrum of (-)-1                                         | S5  |
| <b>Fig. S2</b> The <sup>13</sup> C NMR spectrum of (-)-1                                        | S5  |
| <b>Fig. S3</b> The <sup>13</sup> C/DEPT 135° NMR spectrum of (-)-1                              | S6  |
| <b>Fig. S4</b> The <sup>13</sup> C/DEPT 90° NMR spectrum of (-)-1                               | S6  |
| <b>Fig. S5</b> The <sup>1</sup> H – <sup>1</sup> H COSY NMR spectrum of (-)-1                   | S7  |
| <b>Fig. S6</b> The HSQC NMR spectrum of (-)-1                                                   | S7  |
| <b>Fig. S7</b> The HMBC NMR spectrum of (-)-1                                                   | S8  |
| <b>Fig. S8</b> The <sup>1</sup> H – <sup>1</sup> H NOESY NMR spectrum of (-)-1                  | S8  |
| <b>Fig. S9</b> The <sup>1</sup> H NMR spectrum of (-)-2                                         | S9  |
| <b>Fig. S10</b> The <sup>13</sup> C NMR spectrum of (-)-2                                       | S9  |
| <b>Fig. S11</b> The <sup>13</sup> C/DEPT 135° NMR spectrum of (-)-2                             | S10 |
| <b>Fig. S12</b> The <sup>13</sup> C/DEPT 90° NMR spectrum of (-)-2                              | S10 |
| <b>Fig. S13</b> The <sup>1</sup> H – <sup>1</sup> H COSY NMR spectrum of (-)-2                  | S11 |
| <b>Fig. S14</b> The HSQC NMR spectrum of (-)-2                                                  | S11 |
| <b>Fig. S15</b> The HMBC NMR spectrum of (-)-2                                                  | S12 |
| <b>Fig. S16</b> The <sup>1</sup> H – <sup>1</sup> H NOESY NMR spectrum of (-)-2                 | S12 |
| <b>Fig. S17</b> X-ray crystal structures of (-)-1 and (+)-1                                     | S13 |
| <b>Fig. S18</b> Intermolecular Pt...Pt separation of (-)-1                                      | S13 |
|                                                                                                 | S1  |

|                                                                                                                                       |     |
|---------------------------------------------------------------------------------------------------------------------------------------|-----|
| <b>Fig. S19</b> Intermolecular Pt...Pt separation of (-)- <b>2</b> -ClO <sub>4</sub> -Cl                                              | S13 |
| <b>Fig. S20</b> Emission spectra of (-)- <b>1</b> and (-)- <b>2</b> at 298 and 77 K                                                   | S14 |
| <b>Fig. S21</b> Emission and excitation of (-)-(C <sup>N</sup> <sup>N</sup> )PtCl, (-)- <b>1</b> and (-)- <b>2</b> in dichloromethane | S14 |
| <b>Fig. S22</b> Emission and excitation of (-)- <b>1</b> in different solvents                                                        | S15 |
| <b>Fig. S23</b> Emission and excitation of (-)- <b>2</b> in different solvents                                                        | S15 |

**Table S1.** Structural parameters of complexes (-)-1, (+)-1 and (-)-2-ClO<sub>4</sub>-Cl determined by X-ray single crystal diffraction.

| Bond Length         | (-)-1     | (+)-1     | (-)-2-ClO <sub>4</sub> -Cl |
|---------------------|-----------|-----------|----------------------------|
| Pt1-C1 (C1A)        | 2.023(12) | 2.024(10) | 2.024(10)                  |
| Pt2-C2 (C1B)        | 2.027(12) | 2.024(11) | 1.993(10)                  |
| Pt1-N1 (N1A)        | 2.024(9)  | 2.017(8)  | 2.020(8)                   |
| Pt1-N2 (N2A)        | 2.189(9)  | 2.190(8)  | 2.147(8)                   |
| Pt2-N3 (N1B)        | 2.027(9)  | 2.029(8)  | 2.018(8)                   |
| Pt2-N4 (N2B)        | 2.161(10) | 2.171(8)  | 2.140(8)                   |
| Pt1-P1 (P1A)        | 2.252(3)  | 2.251(2)  | 2.250(3)                   |
| Pt2-P2 (P1B)        | 2.257(3)  | 2.259(2)  | 2.242(3)                   |
| Pt3-C1C             |           |           | 2.028(10)                  |
| Pt4-C1D             |           |           | 2.022(10)                  |
| Pt3-P1C             |           |           | 2.241(3)                   |
| Pt4-P1D             |           |           | 2.238(3)                   |
| Pt3-N1C             |           |           | 2.008(9)                   |
| Pt3-N2C             |           |           | 2.143(8)                   |
| Pt4-N1D             |           |           | 2.013(9)                   |
| Pt4-N2D             |           |           | 2.138(9)                   |
| Bond Angles         | (-)-1     | (+)-1     | (-)-2-ClO <sub>4</sub> -Cl |
| C1(C1A)-Pt1-N1(N1A) | 80.4(4)   | 80.6(4)   | 82.2(4)                    |
| C1(C1A)-Pt1-N2(N2A) | 157.8(4)  | 157.6(4)  | 158.9(4)                   |
| N1(N1A)-Pt1-N2(N2A) | 77.5(4)   | 76.9(3)   | 76.9(3)                    |
| C1(C1A)-Pt1-P1(P1A) | 96.0(3)   | 95.8(3)   | 95.3(3)                    |
| N1(N1A)-Pt1-P1(P1A) | 175.1(3)  | 174.8(3)  | 176.2(2)                   |
| N2(N2A)-Pt1-P1(P1A) | 106.1(2)  | 106.5(2)  | 105.7(2)                   |
| N3(N1B)-Pt2-C2(C1B) | 80.9(5)   | 81.0(4)   | 81.6(4)                    |
| N3(N1B)-Pt2-N4(N2B) | 76.9(4)   | 77.1(4)   | 77.8(4)                    |
| C2(C1B)-Pt2-N4(N2B) | 157.6(4)  | 157.9(4)  | 159.0(4)                   |
| N3(N1B)-Pt2-P2(P1B) | 175.5(3)  | 175.3(3)  | 172.2(2)                   |
| C2(C1B)-Pt2-P2(P1B) | 95.4(4)   | 95.3(3)   | 95.8(3)                    |
| N4(N2B)-Pt2-P2(P1B) | 106.5(3)  | 106.4(2)  | 105.1(3)                   |
| C1C-Pt3-N1C         |           |           | 81.9(4)                    |
| C1C-Pt3-N2C         |           |           | 159.6(4)                   |
| N1C-Pt3-N2C         |           |           | 77.9(3)                    |
| C1C-Pt3-P1C         |           |           | 96.6(3)                    |
| N1C-Pt3-P1C         |           |           | 173.2(2)                   |

|             |          |
|-------------|----------|
| N2C-Pt3-P1C | 103.9(2) |
| C1D-Pt4-N1D | 81.7(4)  |
| C1D-Pt4-N2D | 159.6(4) |
| N1D-Pt4-N2D | 78.1(4)  |
| C1D-Pt4-P1D | 96.5(3)  |
| N1D-Pt4-P1D | 171.8(2) |
| N2D-Pt4-P1D | 103.9(3) |

**Table S2.** Spectroscopic and photophysical data for (-)-**1** and (-)-**2** ( $5 \times 10^{-5}$  mol·L<sup>-1</sup>).

| Complex       | UV-vis <sup>a</sup>                                                                             | Emission <sup>a</sup>                                    | Emission <sup>b</sup>         |
|---------------|-------------------------------------------------------------------------------------------------|----------------------------------------------------------|-------------------------------|
|               | $\lambda_{\max}$ , nm<br>( $\epsilon$ , 10 <sup>4</sup> L·mol <sup>-1</sup> ·cm <sup>-1</sup> ) | $\lambda_{\max}$ , nm ( $\tau$ /ns, $\Phi$ )<br>at 298 K | $\lambda_{\max}$ , nm at 77 K |
| (-)- <b>1</b> | 256 (46600), 345 (16000), 423 (3300), 479 (1800), 510 (1000)                                    | 547, 638 (248, 0.11)                                     | 620                           |
| (-)- <b>2</b> | 255 (60700), 273 (50800), 339 (23900), 354 (23500), 420 (1800), 475 (220), 500 (70)             | 530 (814, 0.15), 563                                     | 519, 559                      |

<sup>a</sup> Measured in CH<sub>2</sub>Cl<sub>2</sub> solution. <sup>b</sup> Measured in MeOH/EtOH (1/4, v/v) glassy solution.

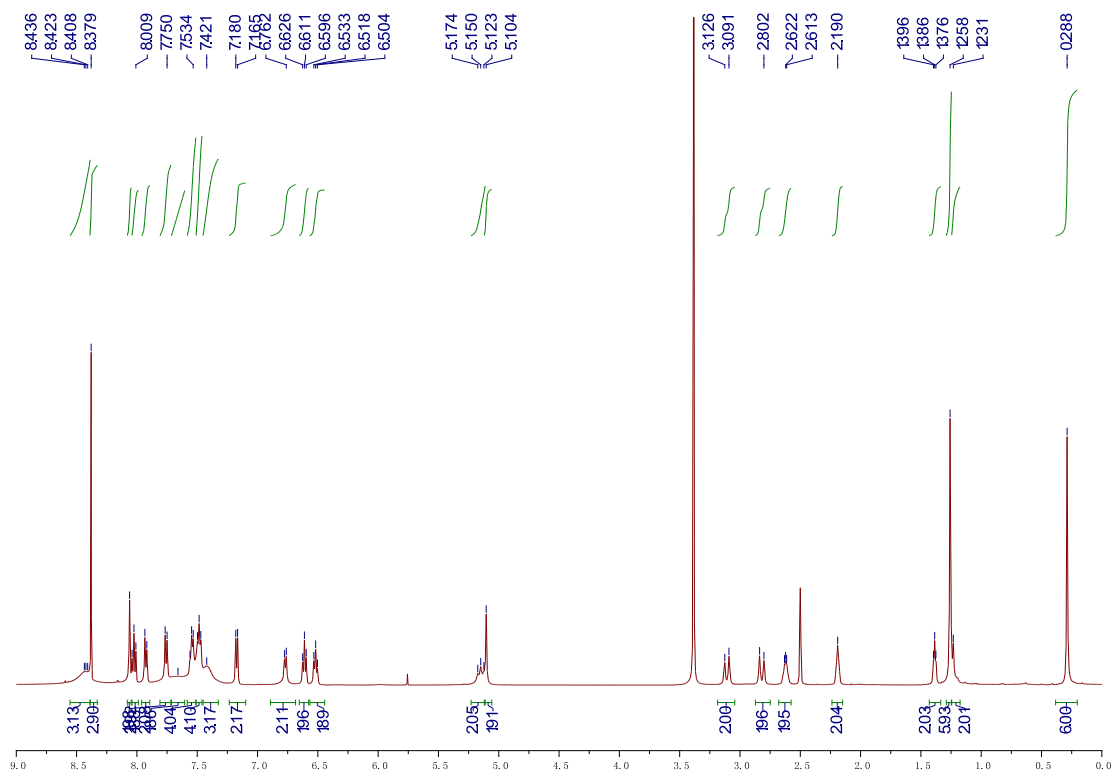

Fig. S1 The  $^1\text{H}$  NMR spectrum of (-)-1.

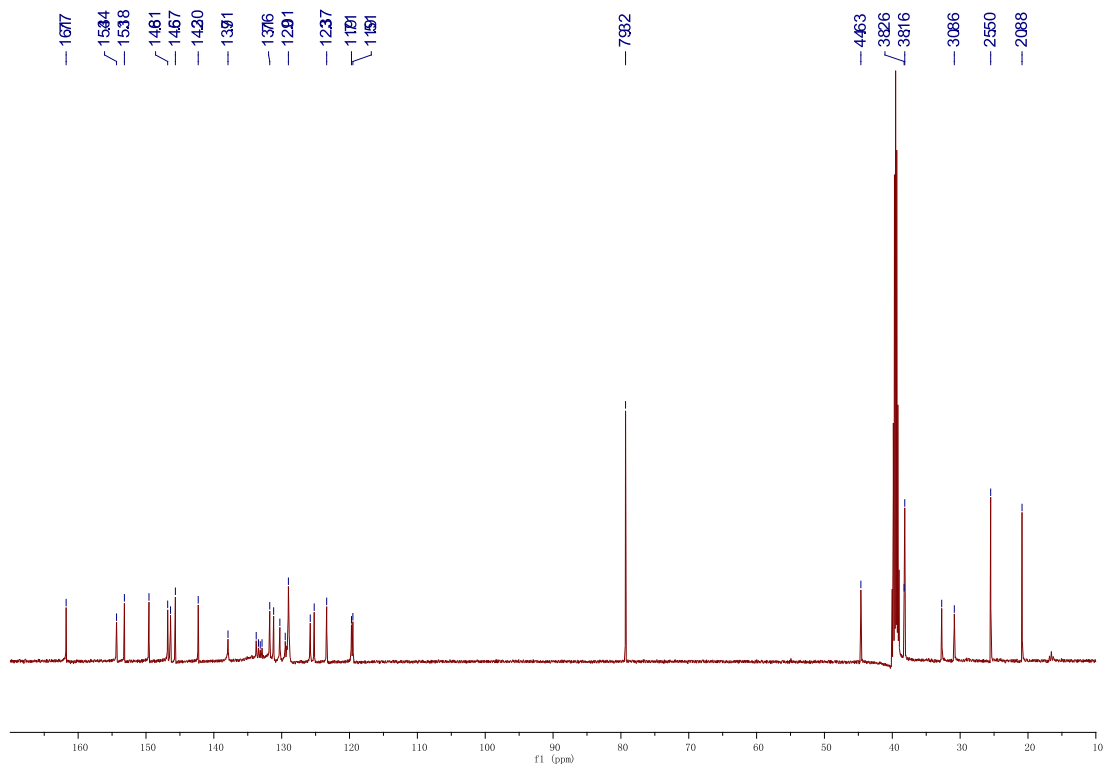

Fig. S2 The  $^{13}\text{C}$  NMR spectrum of (-)-1.

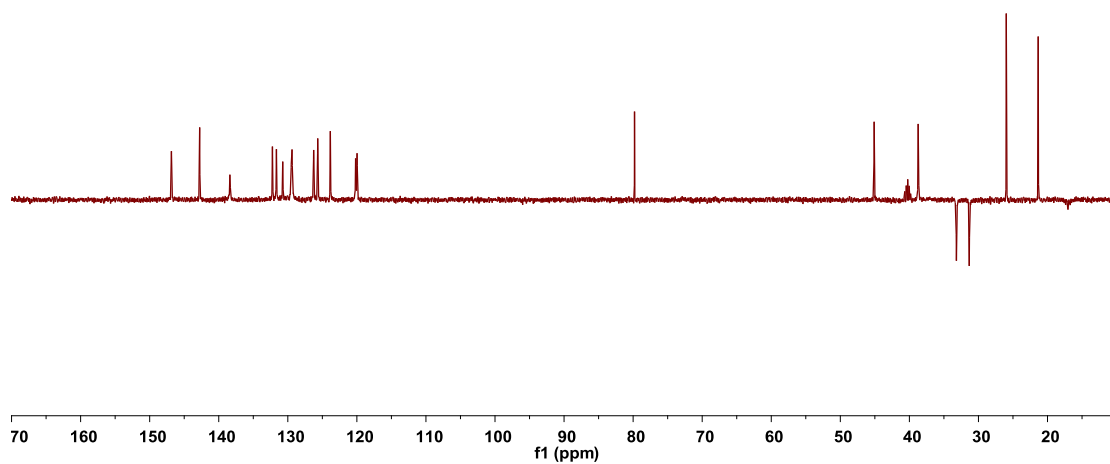

**Fig. S3** The  $^{13}\text{C}/\text{DEPT } 135^\circ$  NMR spectrum of (-)-1.

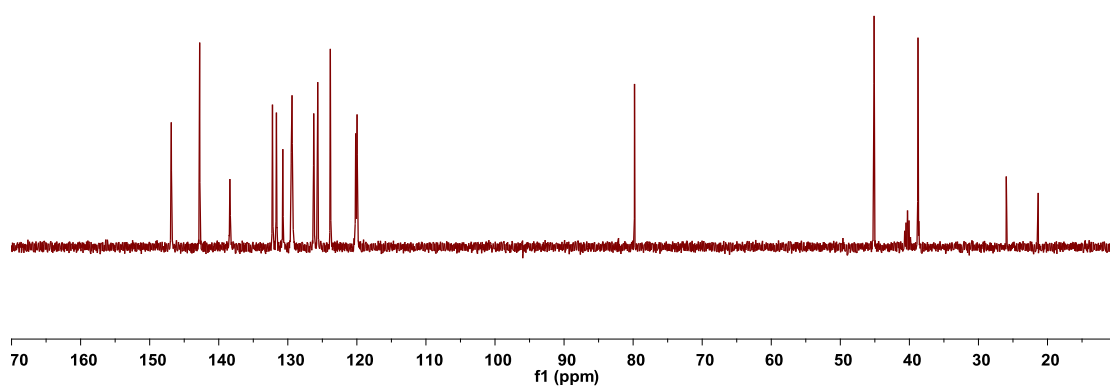

**Fig. S4** The  $^{13}\text{C}/\text{DEPT } 90^\circ$  NMR spectrum of (-)-1.

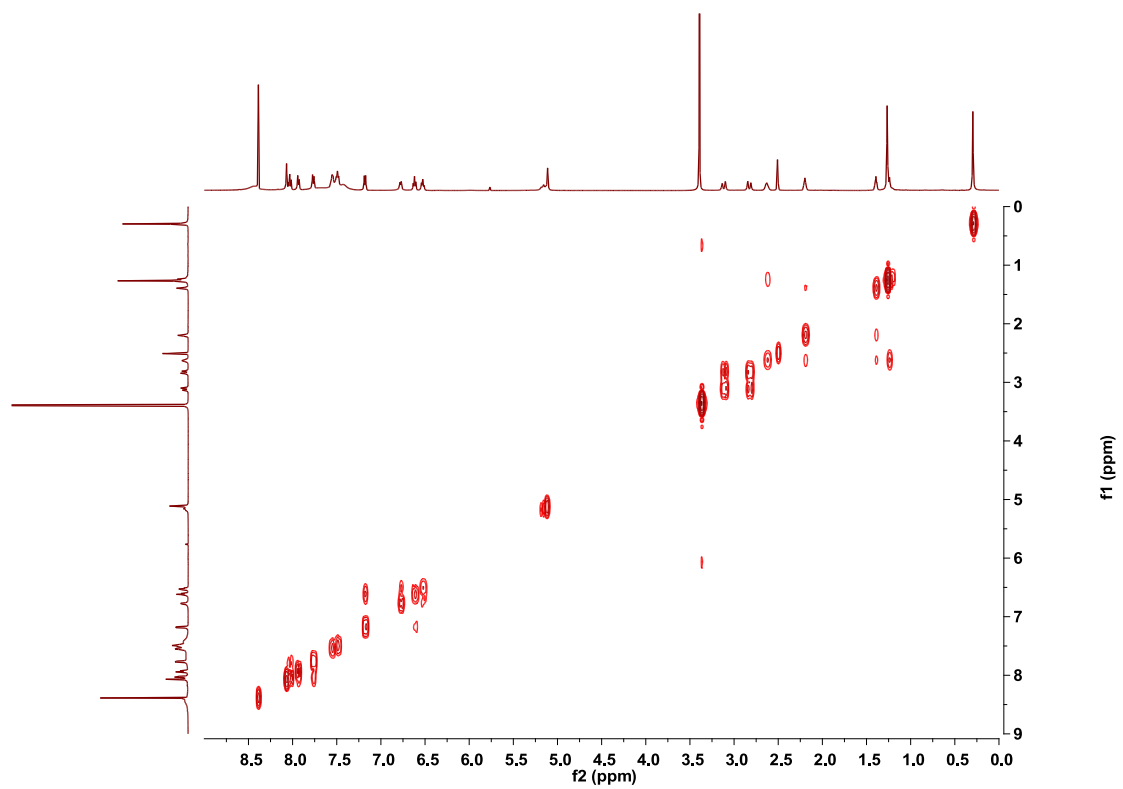

**Fig. S5** The  $^1\text{H} - ^1\text{H}$  COSY NMR spectrum of (-)-1.

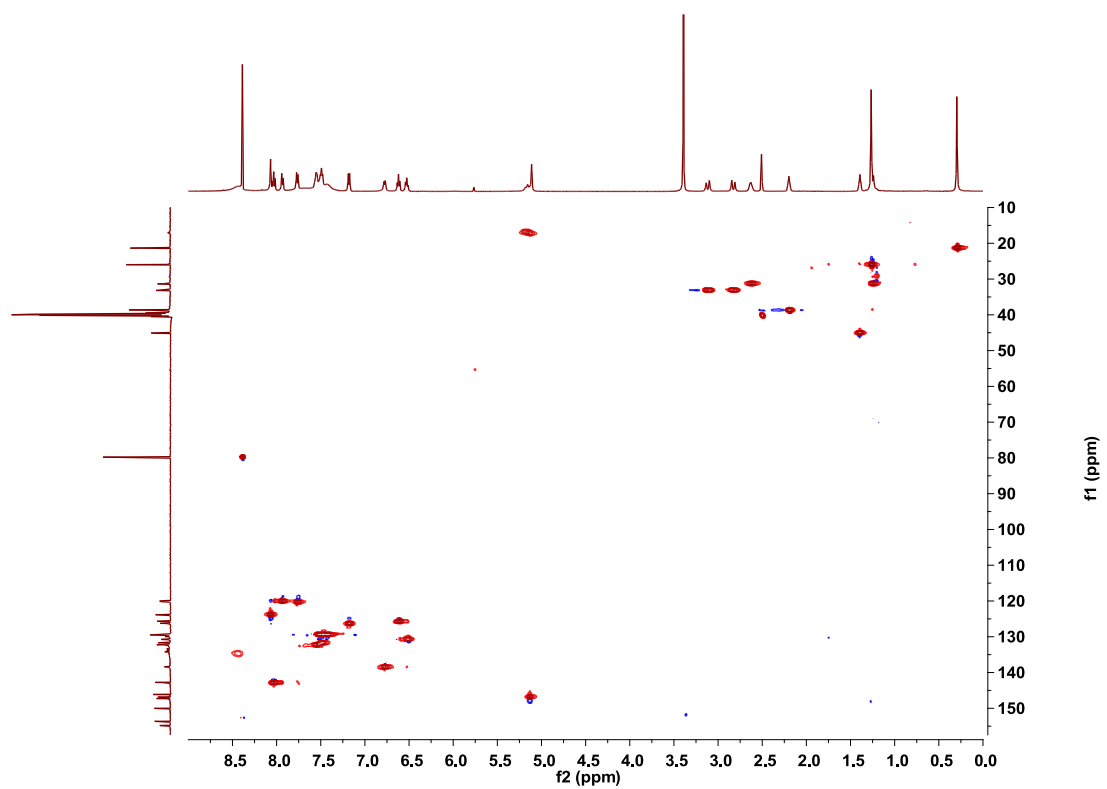

**Fig. S6** The HSQC NMR spectrum of (-)-1.

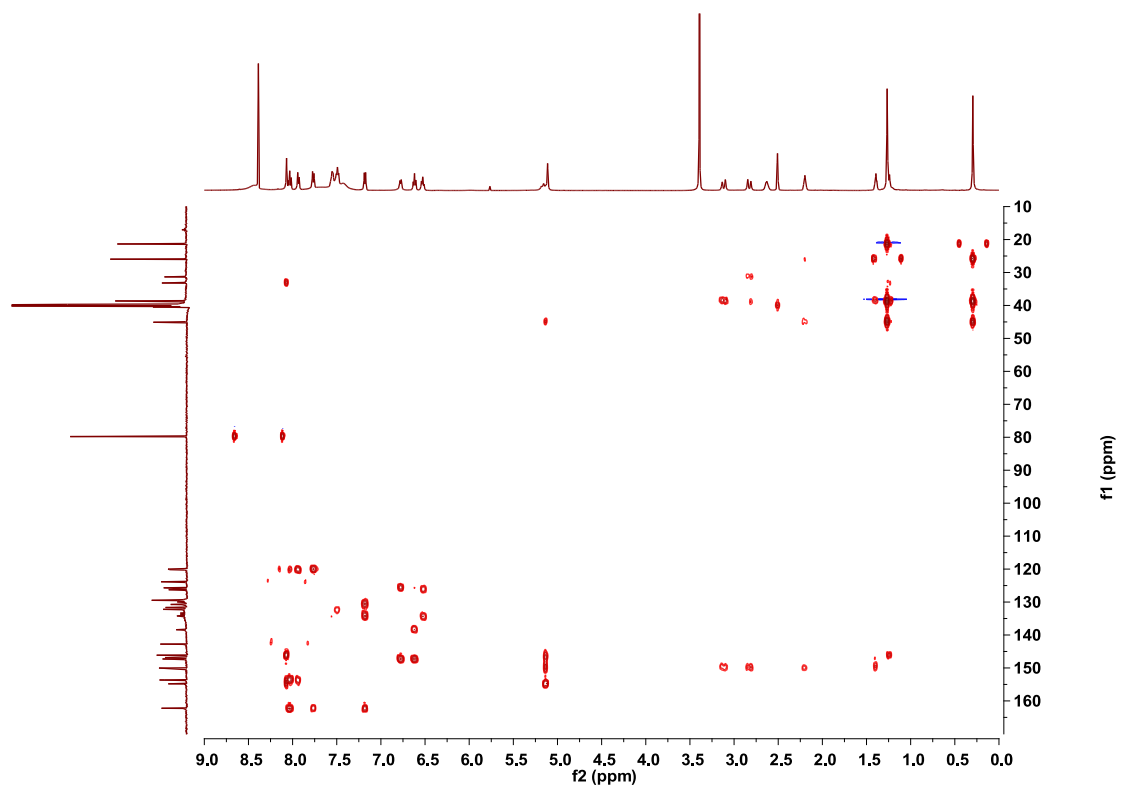

Fig. S7 The HMBC NMR spectrum of (-)-1.

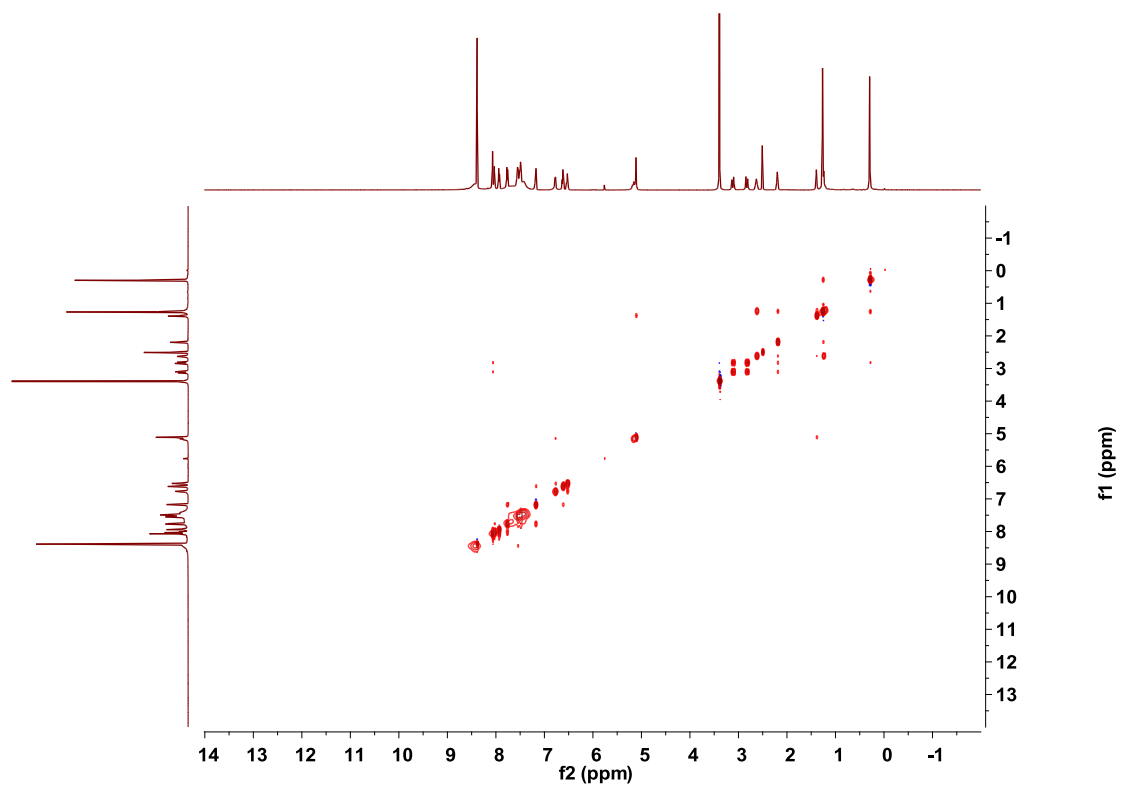

Fig. S8 The  $^1\text{H} - ^1\text{H}$  NOESY NMR spectrum of (-)-1.



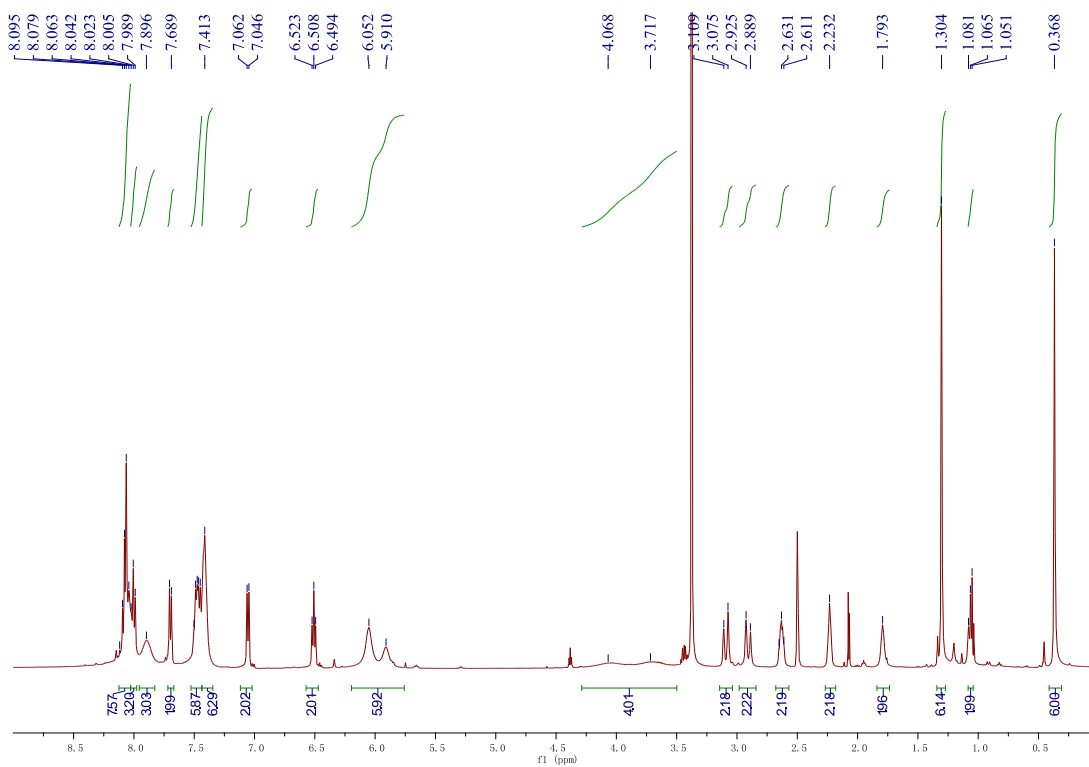

Fig. S9 The  $^1\text{H}$  NMR spectrum of (-)-2.

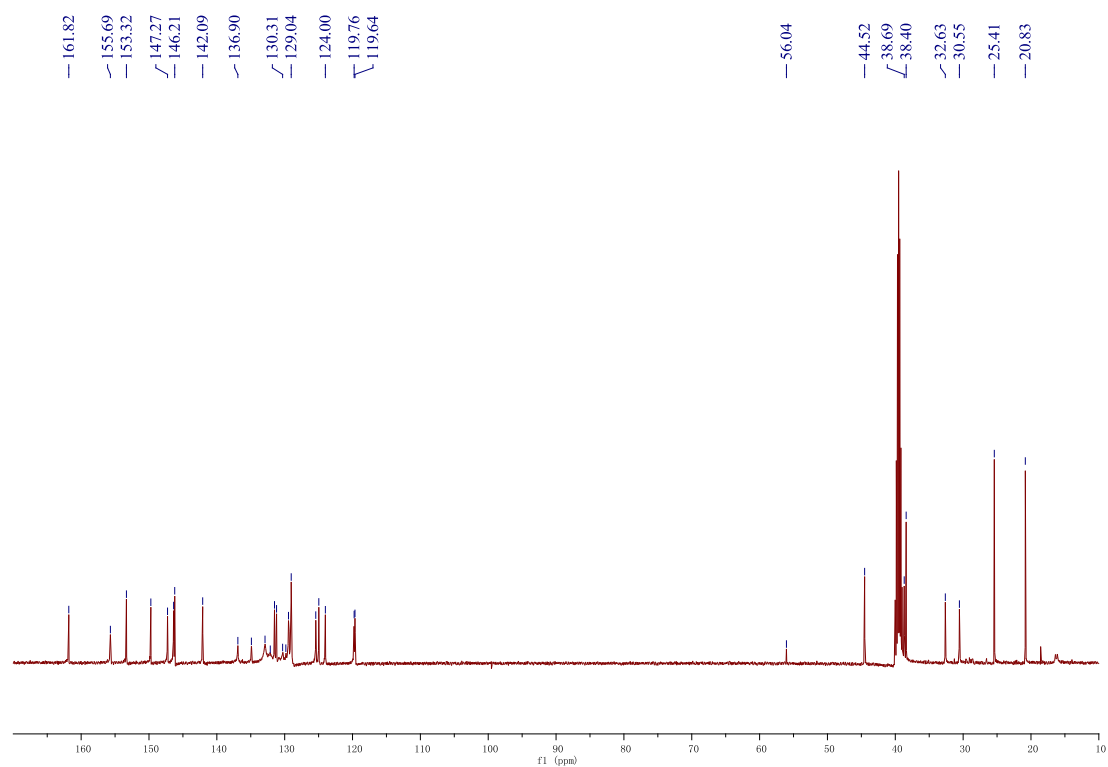

Fig. S10 The  $^{13}\text{C}$  NMR spectrum of (-)-2.

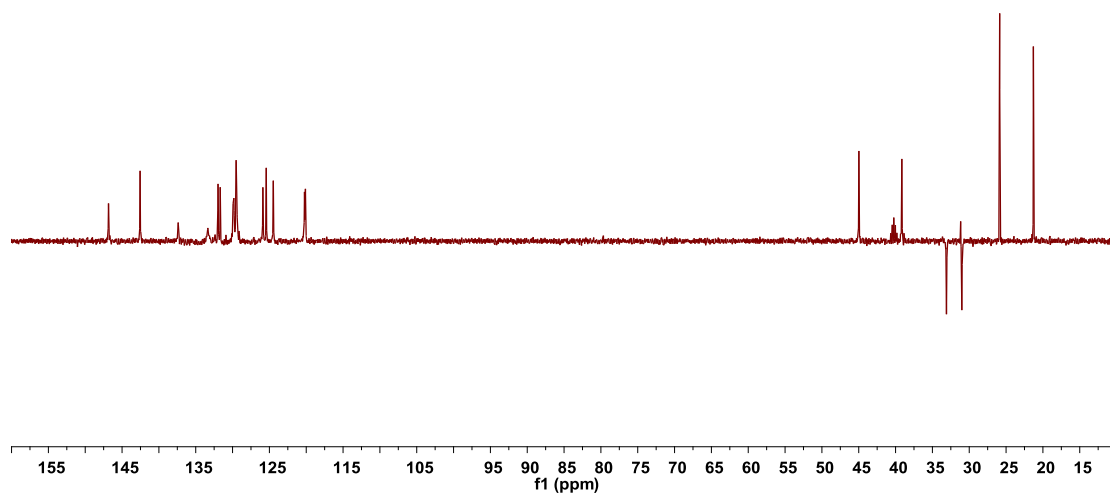

**Fig. S11** The  $^{13}\text{C}/\text{DEPT } 135^\circ$  NMR spectrum of (-)-2.

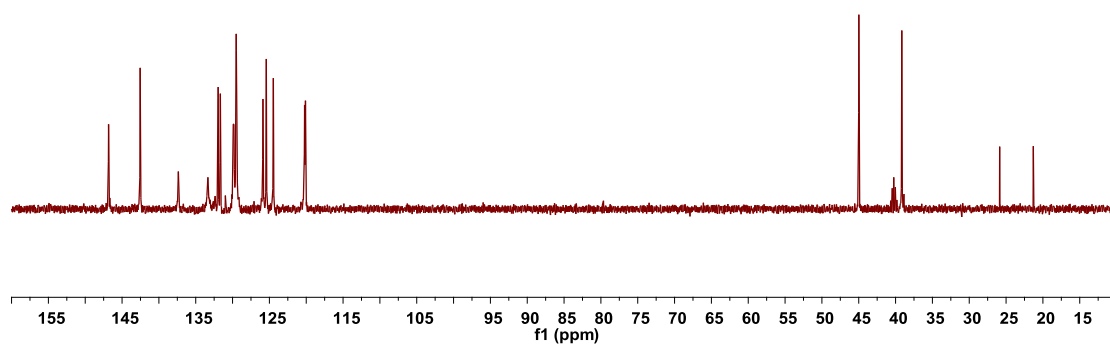

**Fig. S12** The  $^{13}\text{C}/\text{DEPT } 90^\circ$  NMR spectrum of (-)-2.

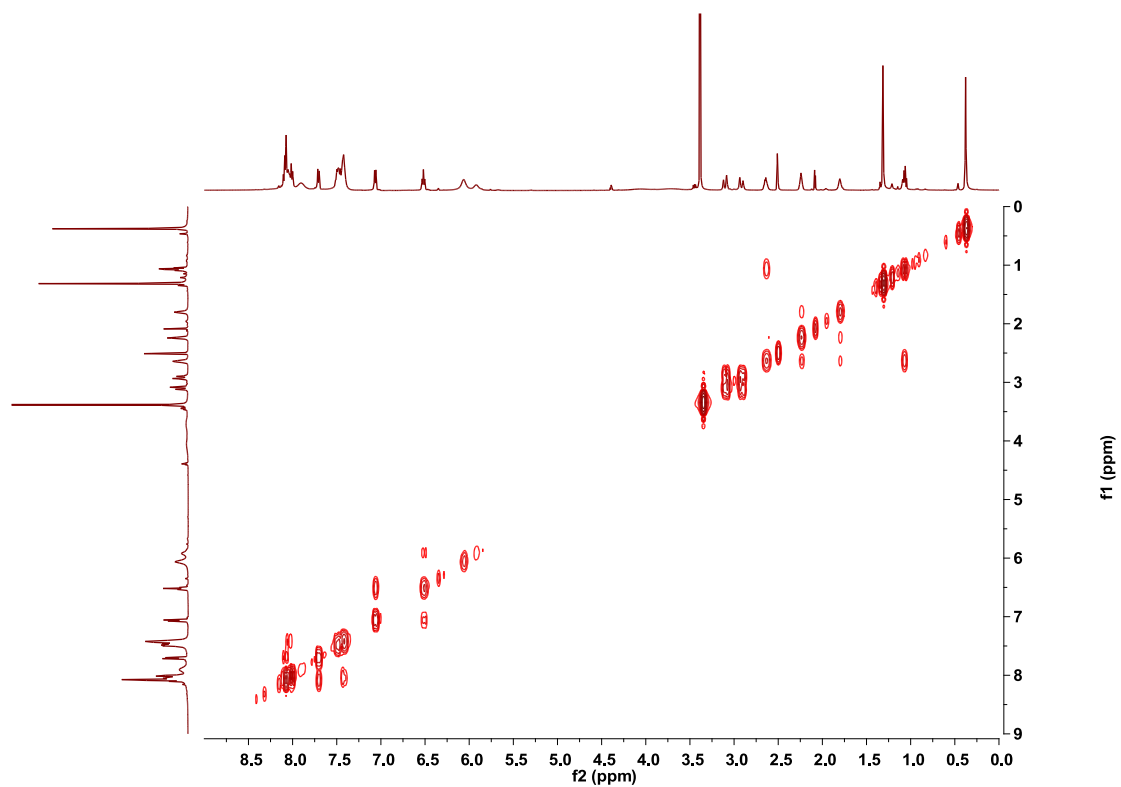

Fig. S13 The  $^1\text{H} - ^1\text{H}$  COSY NMR spectrum of (-)-2.

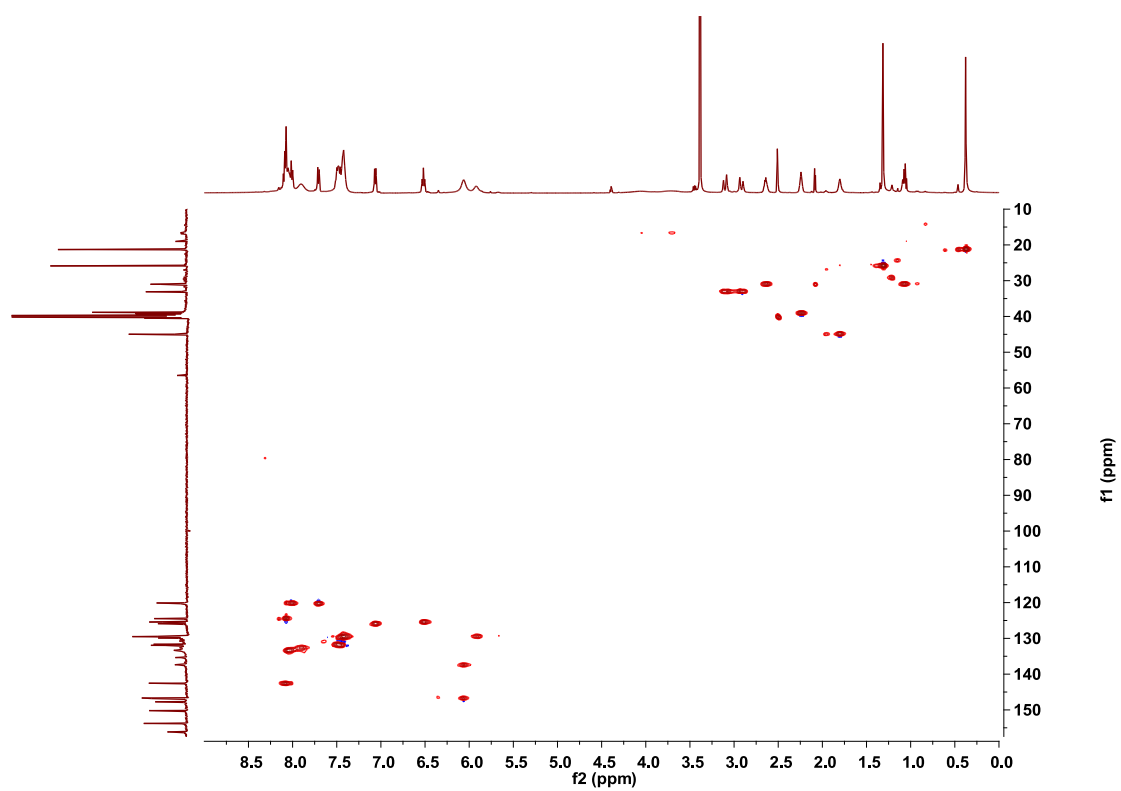

Fig. S14 The HSQC NMR spectrum of (-)-2.

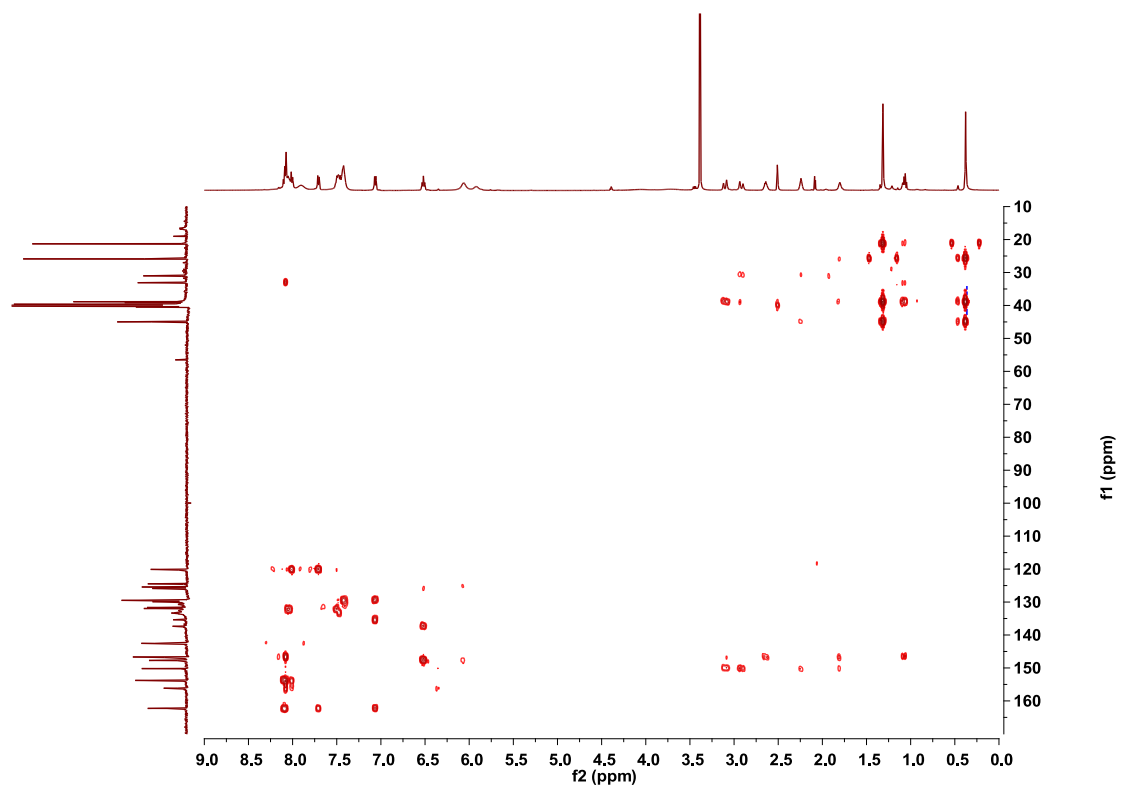

Fig. S15 The HMBC NMR spectrum of (-)-2.

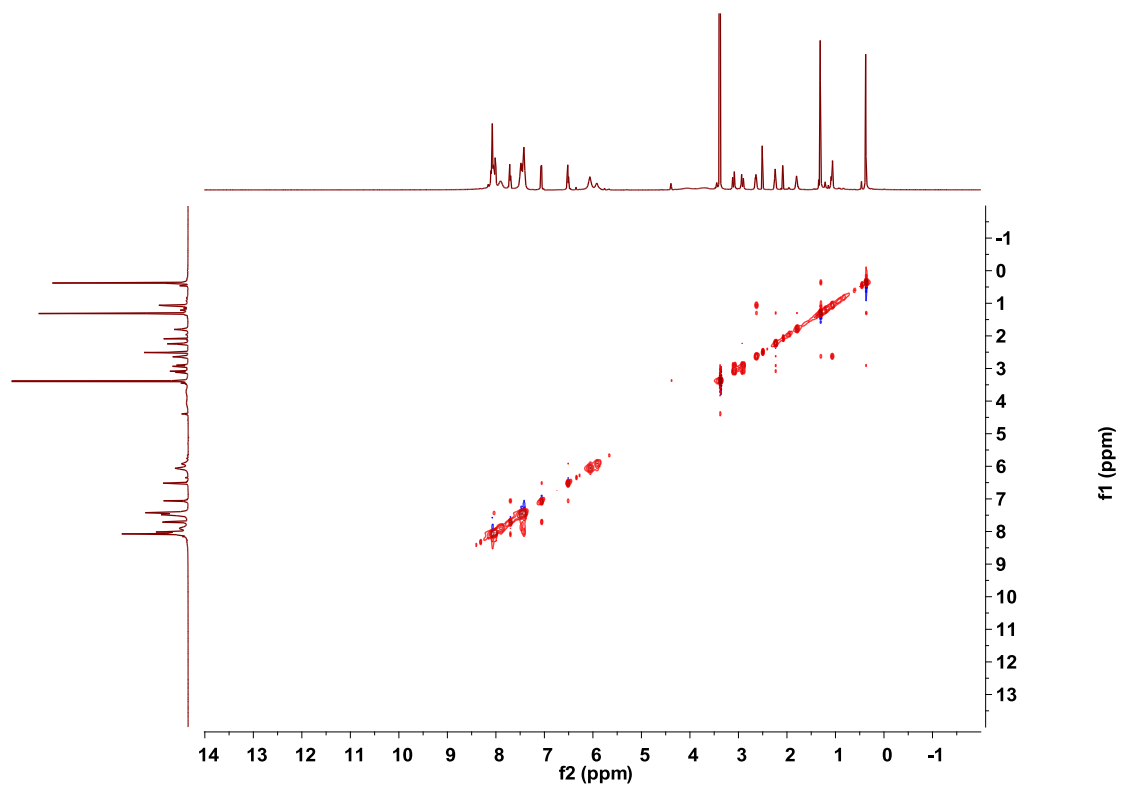

Fig. S16 The  $^1\text{H} - ^1\text{H}$  NOESY NMR spectrum of (-)-2.

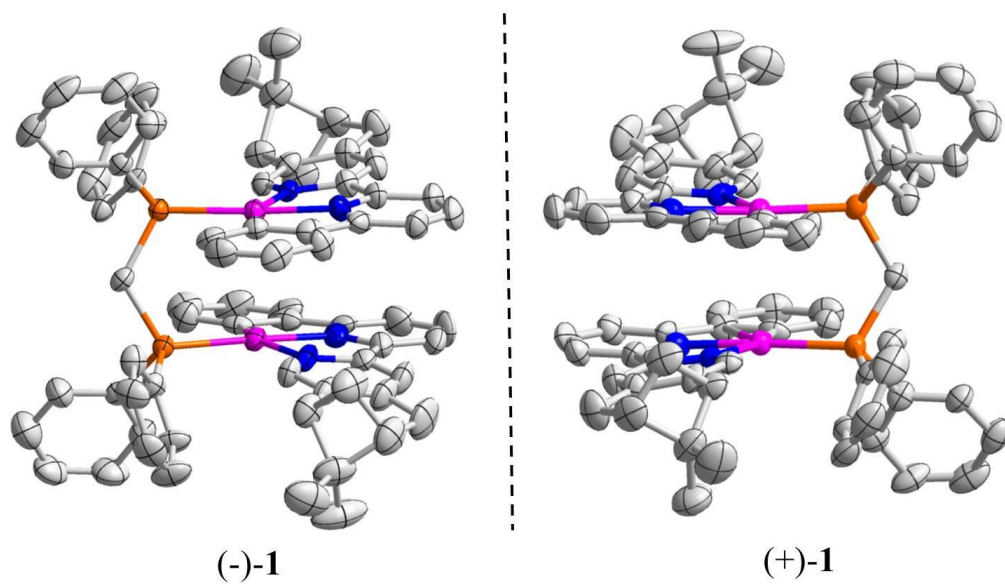

**Fig. S17** X-ray crystal structures of (-)-1 and (+)-1. H atoms, solvent molecules as well as anions are omitted for clarity.

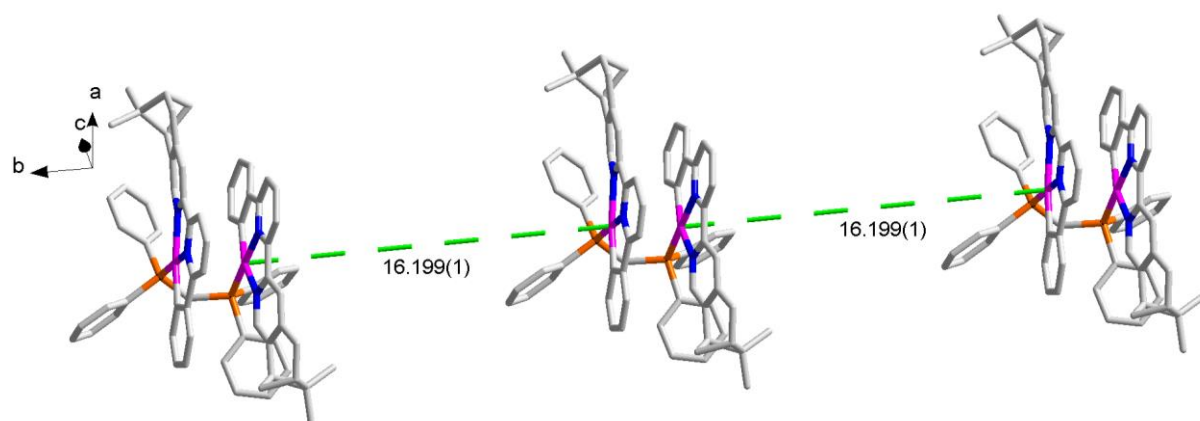

**Fig. S18** Intermolecular Pt...Pt separation between the nearest discrete  $[(-)-(C^{\wedge}N^{\wedge}N)Pt]_2dppm^{2+}$  units of (-)-1.

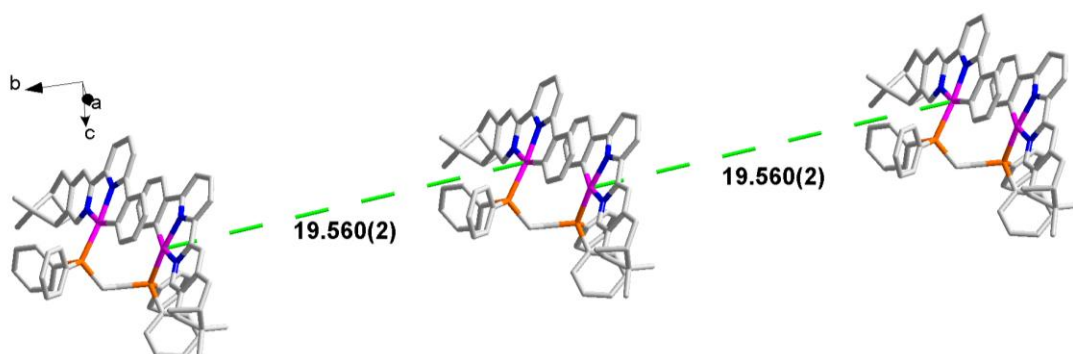

**Fig. S19** Intermolecular Pt...Pt separation between the nearest discrete  $[(-)-(C^{\wedge}N^{\wedge}N)Pt]_2dppe^{2+}$  units of (-)-2-ClO<sub>4</sub>-Cl.

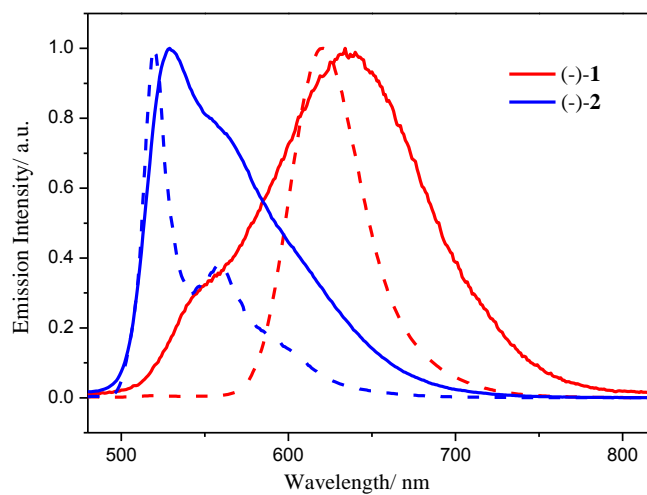

**Fig. S20** Emission spectra of (-)-1 and (-)-2 at 298 (solid line) and 77 K (dash line) ( $\lambda_{\text{ex}} = 420 \text{ nm}$ )

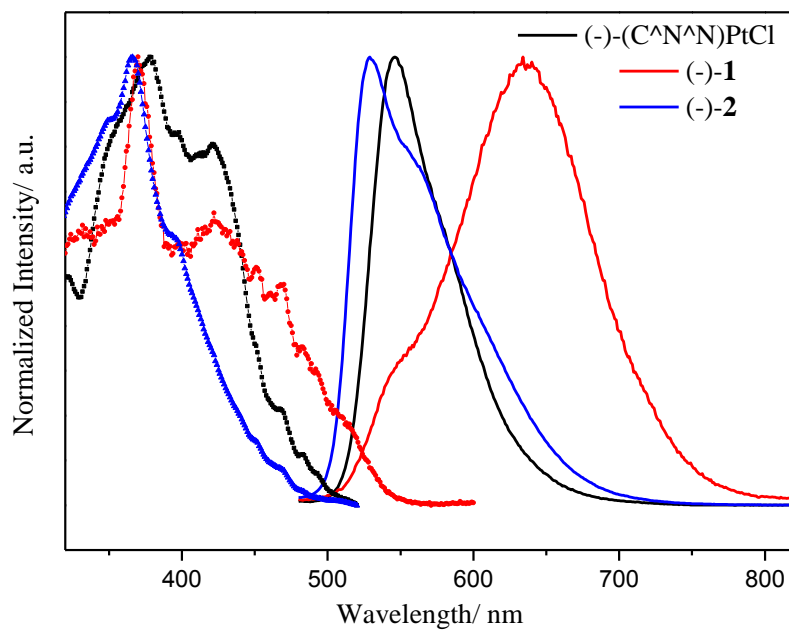

**Fig. S21** Normalized emission (line,  $\lambda_{\text{ex}} = 420 \text{ nm}$ ) and excitation (symbol + line, monitored at emission maximum) of (-)-(C^N^N)PtCl, (-)-1 and (-)-2 in dichloromethane.

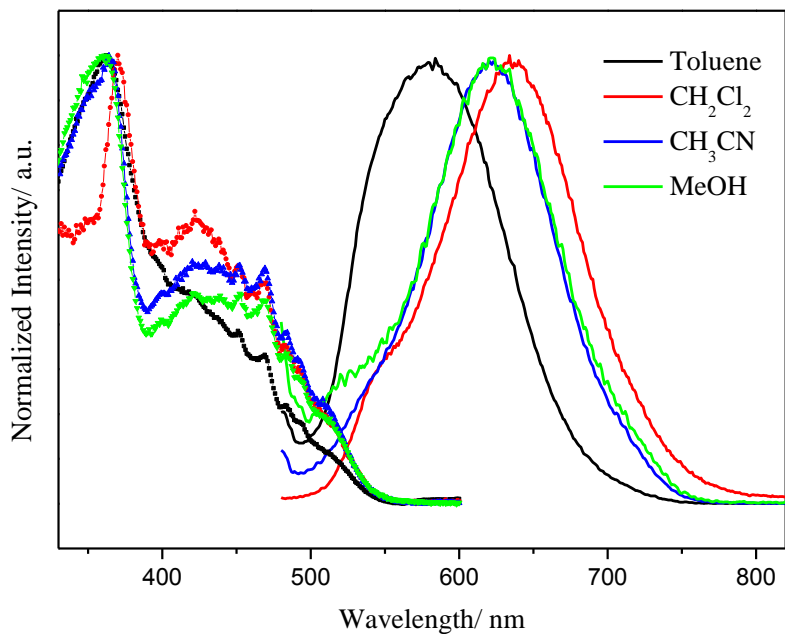

**Fig. S22** Normalized emission (line,  $\lambda_{\text{ex}} = 420 \text{ nm}$ ) and excitation (symbol + line, monitored at emission maximum) of (-)-1 in different solvents.

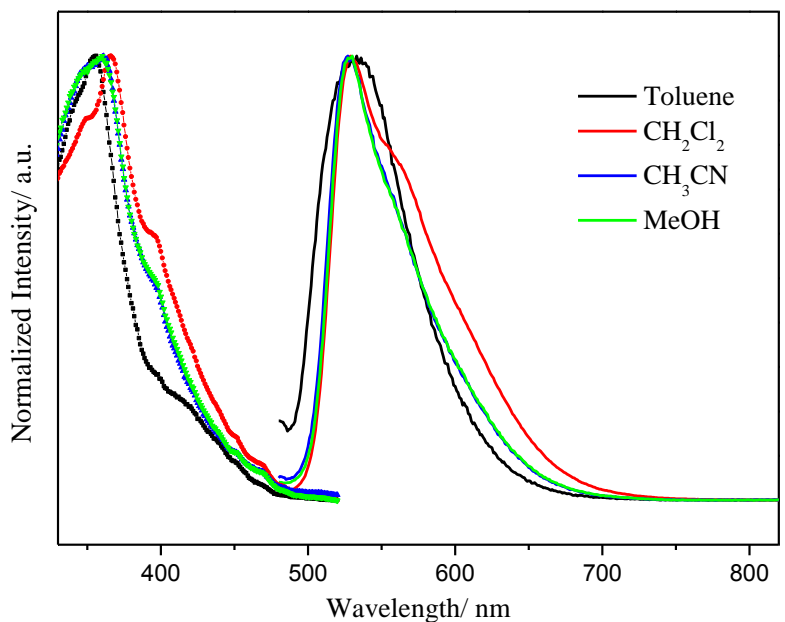

**Fig. S23** Normalized emission (line,  $\lambda_{\text{ex}} = 420 \text{ nm}$ ) and excitation (symbol + line, monitored at emission maximum) of (-)-2 in different solvents.
